1 **Cortical Representations of Speech in a Multi-talker Auditory Scene**

2 Krishna C. Puvvada<sup>a</sup>, Jonathan Z. Simon<sup>a,b,c</sup>

3 <sup>a</sup>Department of Electrical & Computer Engineering, University of Maryland,  
4 College Park, MD 20742

5 <sup>b</sup>Department of Biology, University of Maryland, College Park, MD 20742

6 <sup>c</sup>Institute for Systems Research, University of Maryland, College Park, MD 20742

7  
8 Corresponding author: Jonathan Z. Simon ([jzsimon@umd.edu](mailto:jzsimon@umd.edu)), Department of  
9 Electrical & Computer Engineering, University of Maryland, 8223 Paint Branch  
10 Dr., College Park, MD 20742.

11  
12 Abbreviated title: **Foreground and Background Speech Representations**

13 Number of pages: 42

14 Number of figures: 5

15 Number of words in Abstract: 213

16 Number of words in Introduction: 621

17 Number of words in Discussion: 1485

18 Conflict of Interest: The authors declare no competing financial interests.

19 Acknowledgements: The authors thank Elizabeth Nguyen for excellent MEG  
20 technical support, and Stuart Rosen for advice on the stimulus paradigm. This  
21 work was supported by NIH grant R01 DC014085.

## 22 **Abstract**

23 The ability to parse a complex auditory scene into perceptual objects is facilitated  
24 by a hierarchical auditory system. Successive stages in the hierarchy transform an  
25 auditory scene of multiple overlapping sources, from peripheral tonotopically-  
26 based representations in the auditory nerve, into perceptually distinct auditory-  
27 objects based representation in auditory cortex. Here, using magnetoencephalo-  
28 graphy (MEG) recordings from human subjects, we investigate how a complex  
29 acoustic scene consisting of multiple speech sources is represented in distinct  
30 hierarchical stages of auditory cortex. Using systems-theoretic methods of  
31 stimulus reconstruction, we show that the primary-like areas in auditory cortex  
32 contain dominantly spectro-temporal based representations of the entire auditory  
33 scene. Here, both attended and ignored speech streams are represented with almost  
34 equal fidelity, and a global representation of the full auditory scene with all its  
35 streams is a better candidate neural representation than that of individual streams  
36 being represented separately. In contrast, we also show that higher order auditory  
37 cortical areas represent the attended stream separately, and with significantly  
38 higher fidelity, than unattended streams. Furthermore, the unattended background  
39 streams are more faithfully represented as a single unsegregated background  
40 object rather than as separated objects. Taken together, these findings demonstrate  
41 the progression of the representations and processing of a complex acoustic scene  
42 up through the hierarchy of human auditory cortex.

43 **Significance Statement:**

44 Using magnetoencephalography (MEG) recordings from human listeners in a  
45 simulated cocktail party environment, we investigate how a complex acoustic  
46 scene consisting of multiple speech sources is represented in separate hierarchical  
47 stages of auditory cortex. We show that the primary-like areas in auditory cortex  
48 use a dominantly spectro-temporal based representation of the entire auditory  
49 scene, with both attended and ignored speech streams represented with almost  
50 equal fidelity. In contrast, we show that higher order auditory cortical areas  
51 represent an attended speech stream separately from, and with significantly higher  
52 fidelity than, unattended speech streams. Furthermore, the unattended background  
53 streams are represented as a single undivided background object rather than as  
54 distinct background objects.

55

## 56 **Introduction**

57 Individual sounds originating from multiple sources in a complex auditory scene  
58 mix linearly and irreversibly before they enter the ear, yet are perceived as distinct  
59 objects by the listener (Cherry, 1953; Bregman, 1994; McDermott, 2009). The  
60 separation, or rather individual re-creation, of such linearly mixed original sound  
61 sources is a mathematically ill-posed question, yet the brain nevertheless routinely  
62 performs this task with ease. The neural mechanisms by which this perceptual ‘un-  
63 mixing’ of sounds occur, the collective cortical representations of the auditory  
64 scene and its constituents, and the role of attention in both, are key problems in  
65 contemporary auditory neuroscience.

66 It is known that auditory processing in primate cortex is hierarchical (Davis  
67 and Johnsrude, 2003; Hickok and Poeppel, 2007; Rauschecker and Scott, 2009;  
68 Okada et al., 2010; Peelle et al., 2010) with subcortical areas projecting onto the  
69 core areas of auditory cortex, and from there, on to belt, parabelt and additional  
70 auditory areas (Kaas and Hackett, 2000). Sound entering the ear reaches different  
71 anatomical/functional areas of auditory cortex with different latencies (Recanzone  
72 et al., 2000; Nourski et al., 2014). Due to this serial component of auditory  
73 processing, the hierarchy of processing can be described by both anatomy and  
74 latency, of which the latter may be exploited using the high temporal fidelity of  
75 non-invasive magnetoencephalography (MEG) neural recordings.

76           In selective listening experiments using natural speech and MEG, the two  
77 major neural responses known to track the speech envelope are the M50<sub>TRF</sub> and  
78 M100<sub>TRF</sub>, with respective latencies of 30 – 80 ms and 80 – 150 ms, of which the  
79 dominant neural sources are, respectively, Heschl's gyrus (HG) and Planum  
80 temporale (PT) (Steinschneider et al., 2011; Ding and Simon, 2012a).  
81 Posteromedial HG is the site of core auditory cortex; PT contains both belt and  
82 parabelt auditory areas (here collectively referred to as higher-order areas)  
83 (Griffiths and Warren, 2002; Sweet et al., 2005). Hence the earlier neural  
84 responses are dominated by core auditory cortex, and the later are dominated by  
85 higher-order areas. To better understand the neural mechanisms of auditory scene  
86 analysis, it is essential to understand how the cortical representations of a complex  
87 auditory scene change from the core to the higher order auditory areas.

88           One topic of interest is whether the brain maintains distinct neural  
89 representations for each unattended source (in addition to the representation of the  
90 attended source), or if all unattended sources are represented collectively as a  
91 single monolithic background object. A common paradigm used to investigate the  
92 neural mechanisms underlying auditory scene analysis employs a pair of speech  
93 streams, of which one is attended, which then leaves the other speech stream  
94 remaining as the background (Ding and Simon, 2012a; Mesgarani and Chang,  
95 2012; Zion Golumbic et al., 2013b). This results in a limitation, which cannot

96 address the question of distinct vs. collective neural representations for unattended  
97 sources. This touches on the long-standing debate of whether auditory object  
98 segregation is pre-attentive or it is actively influenced by attention (Carlyon, 2004;  
99 Sussman et al., 2005; Shinn-Cunningham, 2008; Shamma et al., 2011). Evidence  
100 for segregated neural representations of background streams would support the  
101 former, whereas a lack of segregated background objects would support the latter.

102 To address these issues, we use MEG to investigate a variety of potential  
103 cortical representations of the elements of a multi-talker auditory scene. We test  
104 two major hypotheses: that the dominant representation in core auditory cortex is  
105 of the physical acoustics, not of separated auditory objects; and that once object-  
106 based representations emerge in higher order auditory areas, the unattended  
107 contributions to the auditory scene are represented collectively as a single  
108 background object. The methodological approach employs the linear systems  
109 methods of stimulus prediction and MEG response reconstruction (Ding and  
110 Simon, 2012a; Mesgarani and Chang, 2012; Di Liberto et al., 2015).

111

## 112 **Materials & Methods:**

113 ***Subjects & Experimental Design*** Nine normal-hearing, young adults (6 Female)  
114 participated in the experiment. All subjects were paid for their participation. The  
115 experimental procedures were approved by the University of Maryland

116 Institutional Review Board. Subjects listened to a mixture of three speech  
117 segments spoken by, respectively, a male adult, female adult and a child speaker.  
118 The three speech segments were mixed into a single audio channel with equal  
119 perceptual loudness. All three speech segments were taken from public domain  
120 narration of Grimms' Fairy Tales by Jacob & Wilhelm Grimm  
121 (<https://librivox.org/fairy-tales-by-the-brothers-grimm/>). Periods of silence longer  
122 than 300 ms were replaced by a shorter gap whose duration was chosen randomly  
123 between 200 ms and 300 ms. The audio signal was low-pass filtered below 4 kHz.  
124 In first of three conditions, the subjects were asked to attend to the child speaker,  
125 while ignoring the other two (i.e., child speaker as target, with male and female  
126 adult speakers as background). In condition two, during which the same mixture  
127 was played as in condition one, the subjects were instead asked to attend to the  
128 male adult speaker (with female adult and child speakers as background).  
129 Similarly, in condition three, the target was switched to the female adult speaker.  
130 Each condition was repeated three times successively, producing three trials per  
131 condition. The presentation order of the three conditions was counterbalanced  
132 across subjects. Each trial was of 220 s duration, divided into two 110 s sections,  
133 to reduce listener fatigue. To help participants attend to the correct speaker, the  
134 first 30 s of each section was replaced by the clean recording of the target speaker  
135 alone, followed by a 5 s upward linear ramp of the background speakers.

136 Recordings of this first 35 s of each segment were not included in any analysis. To  
137 further encourage the subjects to attend to the correct speaker, a target-word was  
138 set before each trial and the subjects were asked to count the number of  
139 occurrences of the target-word in the speech of the attended speaker. Additionally,  
140 after each condition, the subject was asked to recount a short summary of the  
141 attended narrative. The subjects were required to close their eyes while listening.  
142 Before the main experiment, 100 repetitions of a 500-Hz tone pip were presented  
143 to each subject to elicit the M100 response, a reliable auditory response occurring  
144 ~100 ms after the onset of a tone pip. This data was used check whether any  
145 potential subjects gave abnormal auditory responses, but no subjects were  
146 excluded based on this criterion.

147

148 ***Data recording and pre-processing*** MEG recordings were conducted using a 160-  
149 channel whole-head system (Kanazawa Institute of Technology, Kanazawa,  
150 Japan). Its detection coils are arranged in a uniform array on a helmet-shaped  
151 surface of the bottom of the dewar, with ~25 mm between the centers of two  
152 adjacent 15.5-mm-diameter coils. Sensors are configured as first-order axial  
153 gradiometers with a baseline of 50 mm; their field sensitivities are  $5 \text{ fT}/\sqrt{\text{Hz}}$  or  
154 better in the white noise region. Subjects lay horizontally in a dimly lit  
155 magnetically shielded room (Yokogawa Electric Corporation). Responses were



156 recorded with a sampling rate of 1 kHz with an online 200-Hz low-pass filter and  
157 60 Hz notch filter. Three reference magnetic sensors and three vibrational sensors  
158 were used to measure the environmental magnetic field and vibrations. The  
159 reference sensor recordings were utilized to reduce environmental noise from the  
160 MEG recordings using the Time-Shift PCA method (de Cheveigne and Simon,  
161 2007). Additionally, MEG recordings were decomposed into virtual sensors/  
162 components using denoising source separation (DSS) (Särelä and Valpola, 2005;  
163 de Cheveigne and Simon, 2008; de Cheveigne and Parra, 2014), a blind source  
164 separation method that enhances neural activity consistent over trials. Specifically,  
165 DSS decomposes the multichannel MEG recording into temporally uncorrelated  
166 components, where each component is determined by maximizing its trial-to-trial  
167 reliability, measured by the correlation between the responses to the same stimulus  
168 in different trials. To reduce the computational complexity, for all further analysis  
169 the 157 MEG sensors were reduced, using DSS, to 4 components in each  
170 hemisphere. Also, both stimulus envelope and MEG responses were band pass  
171 filtered between 1 – 8 Hz (delta and theta bands), which correspond to the slow  
172 temporal modulations in speech (Ding and Simon, 2012b, a).

173

174 ***Terminology and Notation*** As specified in the stimulus description, in each  
175 condition the subject attends to one among the three speech streams. The envelope

176 of attended speech stream is referred to as the ‘foreground’ and the envelope of  
177 each of the two unattended speech streams is referred to as the ‘individual  
178 background’. In contrast, the envelope of the entire unattended part of the  
179 stimulus, comprising *both* unattended speech streams, is referred to as the  
180 ‘combined background’. The envelope of entire acoustic stimulus or auditory  
181 scene, comprising of all the three speech streams is referred to as the ‘acoustic  
182 scene’. Thus, if  $S_a, S_b, S_c$  are three speech stimuli,  $Env(S_a + S_b + S_c)$  is the  
183 acoustic scene. In contrast, the sum of envelopes of three speech streams,  
184  $Env(S_a) + Env(S_b) + Env(S_c)$ , is referred to as the ‘sum of streams’, and the  
185 two are not mathematically equal: even though both are functions of the same  
186 stimuli, they differ due to the non-linear nature of a signal envelope (the linear  
187 correlation between the acoustic scene and the sum of streams is typically  $\sim 0.75$ ).

188 Neural responses with latencies less than  $\sim 85$  ms (typically originating  
189 from core auditory areas) are referred to here as ‘early neural responses’ and  
190 responses with latencies more than  $\sim 85$  ms (typically from higher-order auditory  
191 areas) (Ahveninen et al., 2011; Okamoto et al., 2011; Steinschneider et al., 2011)  
192 are referred to as ‘late neural responses’.

193

194 **Temporal Response Function** In an auditory scene with a single talker, the  
195 relation between MEG neural response and the presented speech stimuli can be  
196 modeled using a linear temporal response function (TRF) as

$$r(t) = \sum_{\tau} s(t - \tau)TRF(\tau) + \epsilon(t) \quad (1)$$

197 where  $t = 0, 1, \dots, T$  is time,  $r(t)$  is the response from any individual sensor or  
198 DSS component,  $s(t)$  is the stimulus envelope in decibels,  $TRF(t)$  is the TRF  
199 itself, and  $\epsilon(t)$  is residual response waveform not explained by the TRF model  
200 (Ding and Simon, 2012b). The envelope is extracted by averaging the auditory  
201 spectrogram, (Chi et al., 2005) along the spectral dimension. The TRF is estimated  
202 using boosting with 10-fold cross-validation (David et al., 2007). In case of single  
203 speech stimuli, the TRF is typically characterized by a positive peak between 30  
204 ms and 80 ms and a negative peak between 90 ms and 130 ms, referred to as  
205  $M50_{TRF}$  and  $M100_{TRF}$  respectively (Ding and Simon, 2012a) (positivity/negativity  
206 of the magnetic field is by convention defined to agree with the corresponding  
207 electroencephalography[EEG] peaks). Success/accuracy of the linear model is  
208 evaluated by how well it predicts neural responses, as measured by the proportion  
209 of the variance explained: the square of the Pearson correlation coefficient  
210 between the MEG measurement and the TRF model prediction.

211 In the case of more than one speaker, the MEG neural response,  $r(t)$  can be  
212 modeled as the sum of the responses to the individual acoustic sources (Ding and

213 Simon, 2012a; Zion Golumbic et al., 2013b), referred to here as the 'Summation  
214 model'. For example, with two speech streams, the neural response would be  
215 modeled as

$$r(t) = \sum_{\tau} S_a(t - \tau)TRF_a(\tau) + \sum_{\tau} S_b(t - \tau)TRF_b(\tau) + \varepsilon(t) \quad (2)$$

216

217 where  $S_a(t)$  and  $S_b(t)$  are the envelopes of the two speech streams, and  $TRF_a(t)$ ,  
218 and  $TRF_b(t)$  are the TRFs corresponding to each stream. The summation model is  
219 easily extended to the case of more than two speech streams, by adding new terms  
220 with each new individual speech stream envelope and the corresponding TRF.

221 In addition to the existing summation model, we propose a new encoding-  
222 model referred to as the 'Early-late model', which allows one to incorporate the  
223 hypothesis that the early neural responses typically represent the entire acoustic  
224 scene, but that the later neural responses differentially represent the separated  
225 foreground and background.

$$r(t) = \sum_{\tau=0}^{\tau=\tau_1} S_A(t - \tau)TRF_A(\tau) + \sum_{\tau=\tau_1}^{\tau=\tau_2} S_F(t - \tau)TRF_F(\tau) + \sum_{\tau=\tau_1}^{\tau=\tau_2} S_B(t - \tau)TRF_B(\tau) + \varepsilon(t) \quad (3)$$

226

227 where  $S_A(t)$  is the (entire) acoustic scene,  $S_F(t)$  is the envelope of attended  
228 (foreground) speech stream, and  $S_B(t)$  is the combined background (i.e., envelope  
229 of everything other than attended speech stream in the auditory scene), and  
230  $TRF_A(t)$ ,  $TRF_F(t)$ , and  $TRF_B(t)$  are the corresponding TRFs.  $\tau_1$ ,  $\tau_2$  represent the

231 boundary values of the integration windows for early and late neural responses  
232 respectively.

233 The explanatory power of different models, such as the Summation and  
234 Early-late models, can be ranked by comparing the accuracy of their response  
235 predictions (illustrated in Figure 1, left).

236

237 (Figure 1 about here)

238

239 ***Decoding speech from neural responses*** While the TRF/encoding analysis  
240 described in the previous section predicts neural response from the stimulus,  
241 decoding analysis reconstructs the stimulus based on the neural response. Thus,  
242 decoding analysis complements the TRF analysis (Mesgarani et al., 2009).

243 Mathematically the envelope reconstruction/decoding operation can be formulated

244 as

$$E(t) = \sum_{k=1}^N \sum_{\tau=\tau_b}^{\tau_e} M_k(t + \tau) D_k(\tau) + \epsilon(t) \quad (4)$$

245

246 where  $E(t)$  is the reconstructed envelope,  $M_k(t)$  is the MEG recording (neural  
247 response) from sensor/component  $k$ , and  $D_k(t)$  is the linear decoder for  
248 sensor/component  $k$ . The times  $\tau_b$  and  $\tau_e$  denote the beginning and end times of  
249 the integration window. By appropriately choosing the values of  $\tau_b$  and  $\tau_e$ ,

250 envelope reconstructions using neural responses from any desired time window  
251 can be compared. The decoder is estimated using boosting analogously to the TRF  
252 estimation in the previous section. In the single talker case the envelope is of that  
253 talker's speech. In a multi-talker case, the envelope to be reconstructed might be  
254 the envelope of the speech of attended talker, or one of the background talkers, or  
255 of a mixture of any two or all three talkers, depending on the model under  
256 consideration. Chance-level reconstruction (i.e., the noise floor) from a particular  
257 neural response is estimated by reconstructing an unrelated stimulus envelope  
258 from that neural response. Figure 2 illustrates the distinction between  
259 reconstruction of stimulus envelope from early and late responses. The stimulus  
260 envelope at time point  $t$  can be reconstructed using neural responses from the  
261 dashed (early response) window or dotted (late response) window. (While it is true  
262 that the late responses to the stimulus at time point  $t - \Delta t$  overlap with early  
263 responses to the stimulus at time point  $t$ , the decoder used to reconstruct the  
264 stimulus at time point  $t$  from early responses is only minimally affected by late  
265 responses to the stimulus at time point  $t - \Delta t$  when the decoder is estimated by  
266 averaging over a long enough duration, e.g., tens of seconds). The cut-off time  
267 between early and late responses,  $\tau_{boundary}$ , was chosen to minimize the overlap  
268 between the  $M50_{TRF}$  and  $M100_{TRF}$  peaks, on a per subject basis, with a typical  
269 value being 85 ms. When decoding from early responses only, the time window of

270 integration is from  $\tau_b = 0$  to  $\tau_e = \tau_{boundary}$ . When decoding from late neural  
271 responses only, the time window of integration is from  $\tau_b = \tau_{boundary}$  to  $\tau_e =$   
272 500 ms.

273

274 (Figure 2 about here)

275

276 The robustness of different representations, such as of Foreground vs.  
277 Background, can be compared by examining the accuracy of their respective  
278 stimulus envelope reconstructions (illustrated in Figure 1, right).

279

280 **Statistics** All statistical comparisons reported here are two-tailed permutation tests  
281 with  $N=1,000,000$  random permutations (within subject). Due to the value of  $N$   
282 selected, the smallest accurate  $p$  value that can be reported is  $2 \times 1/N (= 2 \times 10^{-6})$ ; the  
283 factor of 2 arises from the two-tailed test) and any  $p$  value smaller than  $2/N$  is  
284 reported as  $p < 2 \times 10^{-6}$ . The statistical comparison between foreground and  
285 individual backgrounds requires special mention, since each listening condition  
286 has one foreground but two individual backgrounds. From the perspective of both  
287 behavior and task, both the individual backgrounds are interchangeable. Hence,  
288 when comparing reconstruction accuracy of foreground vs. individual background  
289 the average reconstruction accuracy of the two individual backgrounds is used.

290 Finally, Bayes factor analysis is used, when appropriate, to evaluate evidence in  
291 favor of null hypothesis, since conventional hypothesis testing is not suitable for  
292 such purposes. Briefly, Bayes factor analysis calculates the *posterior odds* i.e., the  
293 ratio of  $P(H_0|observations)$  to  $P(H_1|observations)$ , where  $H_0$  and  $H_1$  are the null  
294 and alternate hypotheses respectively.

$$\frac{P(H_0|observations)}{P(H_1|observations)} = \frac{P(observations|H_0)}{P(observations|H_1)} \times \frac{P(H_0)}{P(H_1)} \quad (5)$$

$$= BF_{01} \times \frac{P(H_0)}{P(H_1)} \quad (6)$$

295 The ratio of  $P(observations|H_0)$  and  $P(observations|H_1)$  is denoted as the Bayes  
296 factor,  $BF_{01}$ . Then, under the assumption of equal priors ( $P(H_0) = P(H_1)$ ), the  
297 posterior odds reduces to  $BF_{01}$ . A  $BF_{01}$  value of 10 indicates that the data is ten  
298 times more likely to occur under the null hypothesis than the alternate hypothesis;  
299 conversely, a  $BF_{01}$  value of 0.1 indicates that the data is 10 times more likely to  
300 occur under the alternate hypothesis than the null hypothesis. Conventionally, a  
301  $BF_{01}$  value between 3 and 10 is considered as moderate evidence in favor of the  
302 null hypothesis, and a value between 10 and 30 is considered strong evidence;  
303 conversely, a  $BF_{01}$  value between 1/3 & 1/10 (respectively 1/10 & 1/30) is  
304 considered moderate (respectively strong) evidence for the alternate hypothesis  
305 (for more details we refer the reader to Rouder et al. (2009)).



306

## 307 **Results**

### 308 *Stimulus reconstruction from early neural responses*

309 To investigate the neural representations of the attended vs. unattended speech  
310 streams associated with early auditory areas, i.e., from core auditory cortex,  
311 (Nourski et al., 2014), the temporal envelope of attended (foreground) and  
312 unattended speech streams (individual backgrounds) were reconstructed using  
313 decoders optimized individually for each speech stream. All reconstructions  
314 performed significantly better than chance level (foreground vs. noise,  $p < 2 \times 10^{-6}$ ;  
315 individual background vs. noise,  $p < 2 \times 10^{-6}$ ), indicating that all three speech  
316 streams are represented in early auditory cortex. Figure 3A shows reconstruction  
317 accuracy for foreground vs. individual backgrounds. A permutation test shows no  
318 significant difference between foreground and individual background ( $p = 0.21$ ),  
319 indicating that there is no evidence of significant neural bias for the attended  
320 speech stream over the ignored speech stream, in early neural responses. In fact,  
321 Bayes Factor analysis ( $BF_{01} = 4.2$ ) indicates moderate support in favor of the null  
322 hypothesis (Rouder et al., 2009), that early neural responses do not distinguish  
323 significantly between attended and ignored speech streams.

324

325

(Figure 3 about here)

326

327           To test the hypothesis that early auditory areas represent the auditory scene  
328 in terms of acoustics, rather than as individual auditory objects, we reconstructed  
329 the acoustic scene (the envelope of the sum of all three speech streams) and  
330 compared it against the reconstruction of the sum of streams (sum of  
331 reconstruction envelopes of each of the three individual speech streams). Separate  
332 decoders optimized individually were used to reconstruct the acoustic scene and  
333 the sum of streams. As can be seen in Figure 3B, the result shows that the acoustic  
334 scene is better reconstructed than the sum of streams ( $p < 2 \times 10^{-6}$ ). This indicates  
335 that early auditory cortex is better described as processing the entire acoustic scene  
336 rather than processing the separate elements of the scene individually.

337

### 338 ***Stimulus reconstruction from late neural responses***

339 While the preceding results were based on early cortical processing, the following  
340 results are based on late auditory cortical processing (responses with latencies  
341 more than ~85 ms). Figure 4A shows the scatter plot of reconstruction accuracy  
342 for the foreground vs. individual background envelopes based on late responses. A  
343 paired permutation test shows that reconstruction accuracy for the foreground is  
344 significantly higher than the background ( $p < 2 \times 10^{-6}$ ). Even though the individual

345 backgrounds are not as reliably reconstructed as foreground, their reconstructions  
346 are nonetheless significantly better than chance level ( $p < 2 \times 10^{-6}$ ).

347         In order to distinguish among possible neural representations of the  
348 background streams, we compared the reconstructability of the envelope of the  
349 entire background as a whole, with the reconstructability of the sum of the  
350 envelopes of the (two) backgrounds. If the background is represented as a single  
351 auditory object (i.e., “the background”), the reconstruction of the envelope of the  
352 entire background should be more faithful than the sum of envelopes of individual  
353 backgrounds. In contrast, if the background is represented as distinct auditory  
354 objects, each distinguished by its own envelope, the reconstruction of the sum of  
355 envelopes of the individual backgrounds should be more faithful. Figure 4B shows  
356 the scatter plot of reconstruction accuracy for the envelope of combined  
357 background vs. the sum of the envelopes of the individual background streams.  
358 Analysis shows that the envelope of the combined background is significantly  
359 better represented than the sum of the individual envelopes of the individual  
360 backgrounds ( $p = 0.012$ ). As noted previously, the envelope of the combined  
361 background is actually strongly correlated with the sum of the envelopes of the  
362 individual backgrounds, meaning that finding a significant difference in their  
363 reconstruction accuracy is *a priori* unlikely, providing even more credence to the  
364 result.

365

366

(Figure 4 about here)

367

368 ***Encoding analysis***

369 Results above from envelope reconstruction suggest that while early neural  
370 responses represent the auditory scene in terms of the acoustics, the later neural  
371 responses represent the auditory scene in terms of a separated foreground and a  
372 single background stream. In order to further test this hypothesis, we use TRF-  
373 based encoding analysis to directly compare two different models of auditory  
374 scene representations. The two models compared are the standard Summation  
375 model (based on parallel representations of all speech streams; see Equation 2) and  
376 the new Early-late model (based on an early representation of the entire acoustic  
377 scene and late representations of separated foreground and background; see  
378 Equation 3). Figure 5 shows the response prediction accuracies for the two  
379 models. A permutation test shows that the accuracy of the Early-late model is  
380 considerably higher than that of the Summation model ( $p < 2 \times 10^{-6}$ ). This indicates  
381 that a model in which early/core auditory cortex processes the entire acoustic  
382 scene but later/higher-order auditory cortex processes the foreground and  
383 background separately has more support than the previously employed model of  
384 parallel processing of separate streams throughout auditory cortex.

385

386

(Figure 5 about here)

387 **Discussion**

388 In this study, we used cortical tracking of continuous speech, in a multi-talker  
389 scenario, to investigate the neural representations of an auditory scene. Differing  
390 latencies of the neural sources processing the same stimuli allow us to separate the  
391 source activity temporally, thus enabling the tracking of differing neural  
392 representations of the auditory scene. From MEG recordings of subjects  
393 selectively attending to one of the three co-located speech streams, we observed  
394 that 1) The early neural responses (with short latencies), which originate primarily  
395 from core auditory cortex, represent the foreground (attended) and background  
396 (ignored) speech streams without any significant difference, whereas the late  
397 neural responses (with longer latencies), which originate primarily from higher-  
398 order areas of auditory cortex, represent the foreground with significantly higher  
399 fidelity than the background; 2) Early neural responses are not only balanced in  
400 how they represent the constituent speech streams, but in fact represent the entire  
401 acoustic scene holistically, rather than as separately contributing individual  
402 perceptual objects; 3) Even though there are two physical speech streams in the  
403 background, no neural segregation is observed for the background speech streams.

404           It is well established that auditory processing in cortex is performed in a  
405 hierarchical fashion, in which an auditory stimulus is processed by different  
406 anatomical areas at different latencies (Inui et al., 2006; Nourski et al., 2014).  
407 Using this idea to inform the neural decoding/encoding analysis allows the  
408 effective isolation of neural signals from a particular cortical area, and thereby the  
409 ability to track changes in neural representations as the stimulus processing  
410 proceeds along the auditory hierarchy. This time-constrained  
411 reconstruction/prediction approach may prove especially fruitful in high-time-  
412 resolution/low-spatial-resolution imaging techniques such as MEG and EEG. Even  
413 though different response components are generated by different neural sources,  
414 standard neural source localization algorithms may perform poorly when different  
415 sources are strongly correlated in their responses (Lutkenhoner and Mosher,  
416 2007). While the proposed method is not to be viewed as an alternative to source  
417 localization methods, it can nonetheless be used to tease apart different  
418 components of MEG/EEG response, without explicit source localization.

419           The envelope reconstruction using the early, auditory core, neural response  
420 component showed no significant difference between foreground and background,  
421 in contrast to reconstruction using the late, higher-order auditory, neural  
422 responses, where the foreground is substantially better represented than any  
423 individual background. This *decoding* result is in agreement with the *encoding*

424 result of (Ding and Simon, 2012a) where the authors showed that the early M50<sub>TRF</sub>  
425 component of the temporal response function is not significantly modulated by  
426 attention, whereas the late M100<sub>TRF</sub> component is modulated by attention.

427       Even though there is no significant difference between the ability to  
428 reconstruct the foreground and background from early neural responses,  
429 nonetheless we observe a non-significant tendency towards an enhanced  
430 representation of the foreground (foreground > background,  $p = 0.21$ ). This could  
431 be due to task-related plasticity of spectro-temporal receptive fields of neurons in  
432 mammalian primary auditory cortex (Fritz et al., 2003), where the receptive fields  
433 of neurons are tuned to match the stimulus characteristics of attended sounds. It  
434 could also be explained by entrainment (Schroeder and Lakatos, 2009; Zion  
435 Golumbic et al., 2012), which postulates that the high excitability periods of  
436 neurons become aligned with temporal structure of foreground, thereby enhancing  
437 its neural representation.

438       The increase in fidelity of the foreground as the response latency increases,  
439 from early neural responses (from core auditory cortex) to late neural responses  
440 (from higher-order auditory cortex), indicates a temporal as well as functional  
441 hierarchy in cortical processing of auditory scene, from core to higher-order areas  
442 in auditory cortex. Similar preferential representation for the attended speech  
443 stream has been demonstrated, albeit with only two speech streams, using delta

444 and theta band neural responses (Ding and Simon, 2012a; Zion Golumbic et al.,  
445 2013a; Zion Golumbic et al., 2013b) as well as high-gamma neural responses  
446 (Mesgarani and Chang, 2012; Zion Golumbic et al., 2013a), and using monaural  
447 (Ding and Simon, 2012a; Mesgarani and Chang, 2012) as well as audio-visual  
448 speech (Zion Golumbic et al., 2013a; Zion Golumbic et al., 2013b).

449         While some researchers suggest a selective entrainment model (Schroeder  
450 and Lakatos, 2009; Zion Golumbic et al., 2013b) as the mechanism underlying the  
451 selective tracking of attended speech, others suggest a temporal coherence model  
452 (Shamma et al., 2011; Ding and Simon, 2012a) as the neuronal mechanism  
453 underlying selective tracking. Natural speech is quasi-rhythmic with different  
454 dominant rates at syllabic, word and prosodic frequencies. The selective  
455 entrainment model suggests that attention causes endogenous low frequency  
456 neural oscillations to align with the temporal structure of the attended speech  
457 stream, thus aligning the high excitability phases of oscillations with events in  
458 attended stream. This effectively forms a mask that favors the attended speech.  
459 The temporal coherence model suggests that selective tracking of attended speech  
460 is achieved through two stages. First is a cortical filtering stage, where feature  
461 selective neurons filter the stimulus producing a multidimensional representation  
462 of auditory scene along different feature axes. This is followed by a second stage,  
463 coherence analysis, which combines different features streams based on their



464 temporal similarity, giving rise to separate perceptions of attended and ignored  
465 streams.

466         The representation of an auditory scene in core auditory cortex is here  
467 shown to be more spectro-temporal- or acoustic-based than object-based, as  
468 demonstrated by the result that the envelope of the auditory scene is better  
469 reconstructed than the sum of envelopes of the individual speech streams (e.g.,  
470 Figure 3B). This is further supported by the result that the Early-late model  
471 predicts MEG neural responses significantly better than Summation model (e.g.,  
472 Figure 5). This is consistent with previous studies that demonstrated that neural  
473 activity in core auditory cortex was highly sensitive to acoustic characteristics of  
474 speech and primarily reflects spectro-temporal attributes of sound (Nourski et al.,  
475 2009; Okada et al., 2010; Steinschneider et al., 2014). All these results suggest that  
476 early neural responses, primarily from core auditory cortex, reflect an acoustic-  
477 based representation rather than object-based. In contrast, Nelken and Bar-Yosef  
478 (2008) suggest that neural auditory objects may form as early as primary auditory  
479 cortex, and Fritz et al. (2003) show that representations of dynamic sounds in  
480 primary auditory cortex are influence by task. It is possible that less complex  
481 stimuli are resolved earlier in the hierarchy of auditory pathway (e.g., sounds that  
482 can be separated via tonotopy) whereas speech streams, which overlap both  
483 spectrally and temporally, are resolved only much later in auditory pathway.

484 It is widely accepted that an auditory scene is *perceived* in terms of  
485 auditory objects (Bregman, 1994; Griffiths and Warren, 2004; Shinn-Cunningham,  
486 2008; Shamma et al., 2011). Ding and Simon (2012b) demonstrated evidence for  
487 an object-based cortical representation of an auditory scene, but did not distinguish  
488 between early and late neural responses. This, coupled with the result here that  
489 early neural responses provide an acoustic, not object-based, representation,  
490 strongly suggest that the object-based representation emerges only in the late  
491 neural responses/higher-order (belt and parabelt) auditory areas. This is further  
492 supported by the observation that acoustic invariance, a property of object-based  
493 representation, is observed in higher order areas but not in core auditory cortex  
494 (Chang et al., 2010; Okada et al., 2010).

495 When the foreground is represented as an auditory object in late neural  
496 responses, the finding that the combined background is better reconstructed than  
497 the sum of envelopes of individual backgrounds (Figure 4B) suggests that in late  
498 neural responses the background is not represented as separated and distinct  
499 auditory objects. This result is consistent with that of Sussman et al. (2005), who  
500 reported an unsegregated background when subjects attended to one of three tone  
501 streams in the auditory scene. This unsegregated background may be a result of an  
502 'analysis-by-synthesis' (Yuille and Kersten, 2006; Poeppel et al., 2008)  
503 mechanism, wherein the auditory scene is first decomposed into basic acoustic

504 elements, followed by top-down processes that guide the synthesis of the relevant  
505 components into a single stream, which then becomes the object of attention. The  
506 remainder of the auditory scene would be the unsegregated background, which  
507 itself might have the properties of an auditory object. When attention shifts, new  
508 auditory objects are correspondingly formed, with the old ones now contributing  
509 to the unstructured background. Shamma et al. (2011) suggest that this top down  
510 influence acts through the principle of temporal coherence. Between the two  
511 opposing views, that streams are formed pre-attentively and that multiple streams  
512 can co-exist simultaneously, or that attention is required to form a stream and only  
513 that single stream is ever present as separated perceptual entity, these findings lend  
514 support to the latter.

515         In summary, these results provide evidence that, in a complex auditory  
516 scene with multiple overlapping spectral and temporal sources, the core areas of  
517 auditory cortex maintains an acoustic representation of the auditory scene with no  
518 significant preference to attended over ignored source, and with no separation into  
519 distinct sources. It is only the higher-order auditory areas that provide an object  
520 based representation for the foreground, but even there the background remains  
521 unsegregated.

522

523

524

525 **References**

526 Ahveninen J, Hamalainen M, Jaaskelainen IP, Ahlfors SP, Huang S, Lin FH, Raij T,

527 Sams M, Vasios CE, Belliveau JW (2011) Attention-driven auditory cortex short-

528 term plasticity helps segregate relevant sounds from noise. Proc Natl Acad Sci U S

529 A 108:4182-4187.

530 Bregman AS (1994) Auditory scene analysis: The perceptual organization of sound: MIT

531 press.

532 Carlyon RP (2004) How the brain separates sounds. Trends Cogn Sci 8:465-471.

533 Chang EF, Rieger JW, Johnson K, Berger MS, Barbaro NM, Knight RT (2010)

534 Categorical speech representation in human superior temporal gyrus. Nat Neurosci

535 13:1428-1432.

536 Cherry EC (1953) Some Experiments on the Recognition of Speech, with One and with 2

537 Ears. Journal of the Acoustical Society of America 25:975-979.

538 Chi T, Ru P, Shamma SA (2005) Multiresolution spectrotemporal analysis of complex

539 sounds. J Acoust Soc Am 118:887-906.

540 David SV, Mesgarani N, Shamma SA (2007) Estimating sparse spectro-temporal

541 receptive fields with natural stimuli. Network 18:191-212.

- 542 Davis MH, Johnsrude IS (2003) Hierarchical processing in spoken language  
543 comprehension. *J Neurosci* 23:3423-3431.
- 544 de Cheveigne A, Simon JZ (2007) Denoising based on time-shift PCA. *J Neurosci*  
545 *Methods* 165:297-305.
- 546 de Cheveigne A, Simon JZ (2008) Denoising based on spatial filtering. *J Neurosci*  
547 *Methods* 171:331-339.
- 548 de Cheveigne A, Parra LC (2014) Joint decorrelation, a versatile tool for multichannel  
549 data analysis. *Neuroimage* 98:487-505.
- 550 Di Liberto GM, O'Sullivan JA, Lalor EC (2015) Low-Frequency Cortical Entrainment to  
551 Speech Reflects Phoneme-Level Processing. *Curr Biol* 25:2457-2465.
- 552 Ding N, Simon JZ (2012a) Emergence of neural encoding of auditory objects while  
553 listening to competing speakers. *Proc Natl Acad Sci U S A* 109:11854-11859.
- 554 Ding N, Simon JZ (2012b) Neural coding of continuous speech in auditory cortex during  
555 monaural and dichotic listening. *J Neurophysiol* 107:78-89.
- 556 Fritz J, Shamma S, Elhilali M, Klein D (2003) Rapid task-related plasticity of  
557 spectrotemporal receptive fields in primary auditory cortex. *Nat Neurosci* 6:1216-  
558 1223.
- 559 Griffiths TD, Warren JD (2002) The planum temporale as a computational hub. *Trends*  
560 *Neurosci* 25:348-353.

- 561 Griffiths TD, Warren JD (2004) What is an auditory object? *Nature Reviews*  
562 *Neuroscience* 5:887-892.
- 563 Hickok G, Poeppel D (2007) The cortical organization of speech processing. *Nat Rev*  
564 *Neurosci* 8:393-402.
- 565 Inui K, Okamoto H, Miki K, Gunji A, Kakigi R (2006) Serial and parallel processing in  
566 the human auditory cortex: a magnetoencephalographic study. *Cereb Cortex* 16:18-  
567 30.
- 568 Kaas JH, Hackett TA (2000) Subdivisions of auditory cortex and processing streams in  
569 primates. *Proc Natl Acad Sci U S A* 97:11793-11799.
- 570 Lutkenhoner B, Mosher JC (2007) Source Analysis of Auditory Evoked Potentials and  
571 Fields. In: *Auditory evoked potentials : basic principles and clinical application*  
572 (Burkard RF, Eggermont JJ, Don M, eds), pp xix, 731 p., 716 p. of plates.  
573 Philadelphia: Lippincott Williams & Wilkins.
- 574 McDermott JH (2009) The cocktail party problem. *Curr Biol* 19:R1024-1027.
- 575 Mesgarani N, Chang EF (2012) Selective cortical representation of attended speaker in  
576 multi-talker speech perception. *Nature* 485:233-236.
- 577 Mesgarani N, David SV, Fritz JB, Shamma SA (2009) Influence of context and behavior  
578 on stimulus reconstruction from neural activity in primary auditory cortex. *J*  
579 *Neurophysiol* 102:3329-3339.

- 580 Nelken I, Bar-Yosef O (2008) Neurons and objects: the case of auditory cortex. Front  
581 Neurosci 2:107-113.
- 582 Nourski KV, Steinschneider M, McMurray B, Kovach CK, Oya H, Kawasaki H, Howard  
583 MA, 3rd (2014) Functional organization of human auditory cortex: investigation of  
584 response latencies through direct recordings. Neuroimage 101:598-609.
- 585 Nourski KV, Reale RA, Oya H, Kawasaki H, Kovach CK, Chen H, Howard MA, 3rd,  
586 Brugge JF (2009) Temporal envelope of time-compressed speech represented in the  
587 human auditory cortex. J Neurosci 29:15564-15574.
- 588 Okada K, Rong F, Venezia J, Matchin W, Hsieh IH, Saberi K, Serences JT, Hickok G  
589 (2010) Hierarchical organization of human auditory cortex: evidence from acoustic  
590 invariance in the response to intelligible speech. Cereb Cortex 20:2486-2495.
- 591 Okamoto H, Stracke H, Bermudez P, Pantev C (2011) Sound processing hierarchy within  
592 human auditory cortex. Journal of Cognitive Neuroscience 23:1855-1863.
- 593 Peelle JE, Johnsrude IS, Davis MH (2010) Hierarchical processing for speech in human  
594 auditory cortex and beyond. Front Hum Neurosci 4:51.
- 595 Poeppel D, Idsardi WJ, van Wassenhove V (2008) Speech perception at the interface of  
596 neurobiology and linguistics. Philos Trans R Soc Lond B Biol Sci 363:1071-1086.
- 597 Rauschecker JP, Scott SK (2009) Maps and streams in the auditory cortex: nonhuman  
598 primates illuminate human speech processing. Nat Neurosci 12:718-724.

- 599 Recanzone GH, Guard DC, Phan ML (2000) Frequency and intensity response properties  
600 of single neurons in the auditory cortex of the behaving macaque monkey. *J*  
601 *Neurophysiol* 83:2315-2331.
- 602 Rouder JN, Speckman PL, Sun D, Morey RD, Iverson G (2009) Bayesian t tests for  
603 accepting and rejecting the null hypothesis. *Psychon Bull Rev* 16:225-237.
- 604 Särelä J, Valpola H (2005) Denoising source separation. *Journal of Machine Learning*  
605 *Research* 6:233-272.
- 606 Schroeder CE, Lakatos P (2009) Low-frequency neuronal oscillations as instruments of  
607 sensory selection. *Trends Neurosci* 32:9-18.
- 608 Shamma SA, Elhilali M, Micheyl C (2011) Temporal coherence and attention in auditory  
609 scene analysis. *Trends Neurosci* 34:114-123.
- 610 Shinn-Cunningham BG (2008) Object-based auditory and visual attention. *Trends Cogn*  
611 *Sci* 12:182-186.
- 612 Steinschneider M, Liégeois-Chauvel C, Brugge JF (2011) Auditory evoked potentials and  
613 their utility in the assessment of complex sound processing. In: *The auditory cortex*,  
614 pp 535-559: Springer.
- 615 Steinschneider M, Nourski KV, Rhone AE, Kawasaki H, Oya H, Howard MA, 3rd  
616 (2014) Differential activation of human core, non-core and auditory-related cortex



- 617 during speech categorization tasks as revealed by intracranial recordings. *Front*  
618 *Neurosci* 8:240.
- 619 Sussman ES, Bregman AS, Wang WJ, Khan FJ (2005) Attentional modulation of  
620 electrophysiological activity in auditory cortex for unattended sounds within  
621 multistream auditory environments. *Cogn Affect Behav Neurosci* 5:93-110.
- 622 Sweet RA, Dorph-Petersen KA, Lewis DA (2005) Mapping auditory core, lateral belt,  
623 and parabelt cortices in the human superior temporal gyrus. *J Comp Neurol*  
624 491:270-289.
- 625 Yuille A, Kersten D (2006) Vision as Bayesian inference: analysis by synthesis? *Trends*  
626 *in cognitive sciences* 10:301-308.
- 627 Zion Golumbic E, Cogan GB, Schroeder CE, Poeppel D (2013a) Visual input enhances  
628 selective speech envelope tracking in auditory cortex at a "cocktail party". *J*  
629 *Neurosci* 33:1417-1426.
- 630 Zion Golumbic EM, Poeppel D, Schroeder CE (2012) Temporal context in speech  
631 processing and attentional stream selection: a behavioral and neural perspective.  
632 *Brain Lang* 122:151-161.
- 633 Zion Golumbic EM, Ding N, Bickel S, Lakatos P, Schevon CA, McKhann GM,  
634 Goodman RR, Emerson R, Mehta AD, Simon JZ, Poeppel D, Schroeder CE (2013b)

635           Mechanisms underlying selective neuronal tracking of attended speech at a "cocktail  
636           party". *Neuron* 77:980-991.  
637

638 **Legend:**

639 Figure 1: Illustrations of different decoding- and encoding-based neural  
640 representations of the auditory scene and its constituents. (*Left*) Examples of  
641 predicted MEG neural response using the Early-late model (red) and the  
642 Summation model (magenta) superimposed on actual MEG response (black). The  
643 proposed Early-late model prediction shows higher correlation with the actual  
644 MEG neural response than Summation model. (*Right*) Example of speech  
645 envelopes reconstructed (grey) from their late neural responses, for both the  
646 foreground and the background, superimposed on actual speech envelopes of  
647 foreground (blue) and background (cyan). The foreground reconstruction shows  
648 higher correlation with the actual foreground envelope, compared to the  
649 background reconstruction with the actual background envelope. All examples are  
650 grand averages across subjects (3 seconds duration).

651

652 Figure 2: Early vs. late MEG neural responses to a continuous speech stimulus. A  
653 sample stimulus envelope and multi-channel MEG recordings are shown in red  
654 and black respectively. The two grey vertical lines indicate two arbitrary time  
655 points at  $t - \Delta t$  and  $t$ . The dashed and dotted boxes represent the early and late  
656 MEG neural responses to stimulus at time point  $t$  respectively. The reconstruction

657 of the stimulus envelope at time  $t$  can be based on either early or late neural  
658 responses, and the separate reconstructions can be compared against each other.

659

660

661 Figure 3: Stimulus envelope reconstruction accuracy using *early* neural responses.

662 **A.** Scatter plot of reconstruction accuracy of the foreground vs. individual

663 background envelopes. No significant difference was observed ( $p = 0.21$ ), and

664 therefore no preferential representation of the foreground speech over the

665 individual background streams is revealed in early neural responses. **B.** Scatter

666 plot of reconstruction accuracy of the envelope of the entire acoustic scene vs. that

667 of the sum of the envelopes of all three individual speech streams. The acoustic

668 scene is reconstructed more accurately (visually, most of data points fall above the

669 diagonal) as a whole than as the sum of individual components in early neural

670 responses ( $p < 2 \times 10^{-6}$ ). Reconstruction accuracy is measured by proportion of the

671 variance explained: the square of the Pearson correlation coefficient between the

672 actual and predicted envelopes.

673

674 Figure 4: Stimulus envelope reconstruction accuracy using *late* neural responses.

675 **A.** Scatter plot of accuracy between foreground vs. individual background

676 envelope reconstructions demonstrates that the foreground is represented with

677 dramatically better fidelity (visually, most of data points fall above the diagonal)  
678 than the background speech, in late neural responses ( $p < 2 \times 10^{-6}$ ). **B.** Scatter plot  
679 of the reconstruction accuracy of the envelope of the entire background vs. that of  
680 the sum of the envelopes of the two individual background speech streams. The  
681 background scene is reconstructed more accurately as a monolithic background  
682 than as separated individual background streams in late neural responses ( $p =$   
683 0.012)

684

685 Figure 5: MEG response prediction accuracy. Scatter plot of the accuracy of  
686 predicted MEG neural response for the proposed Early-late model vs. the standard  
687 Summation model. The Early-late model predicts the MEG neural response  
688 dramatically better (visually, most of data points fall above the diagonal) than the  
689 Summation model ( $p < 2 \times 10^{-6}$ ). The accuracy of predicted MEG neural  
690 responses is measured by proportion of the variance explained: the square of the  
691 Pearson correlation coefficient between the actual and predicted responses.

692

**Neural response prediction from stimulus**      **Stimulus reconstruction from neural response**

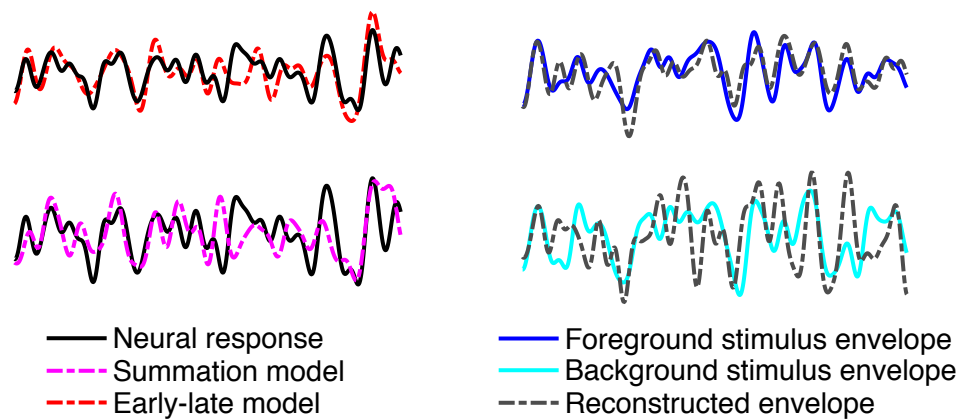

693

694

695 Figure 1

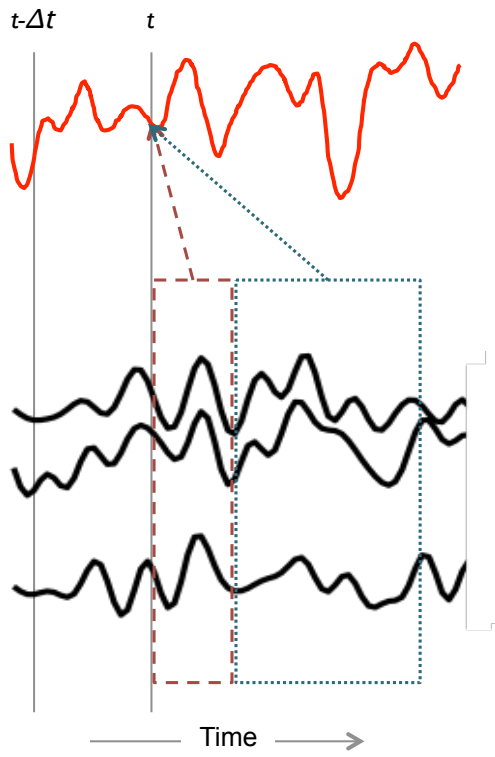

696

697

698 Figure 2

Stimulus Reconstruction Accuracy from **Early** Neural Responses

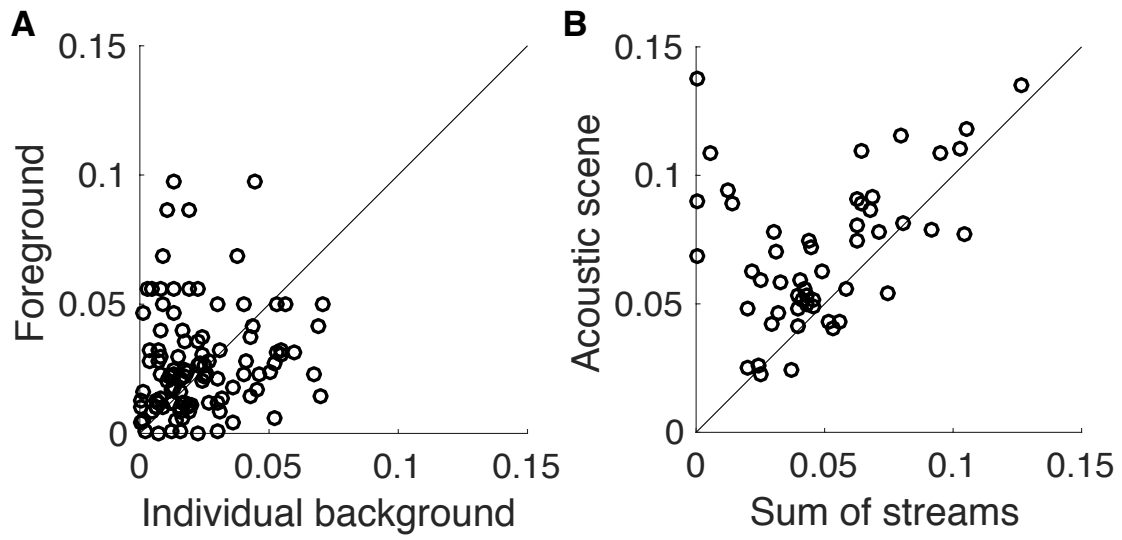

699

700

701 Figure 3



# Stimulus Reconstruction Accuracy from **Late** Neural Responses

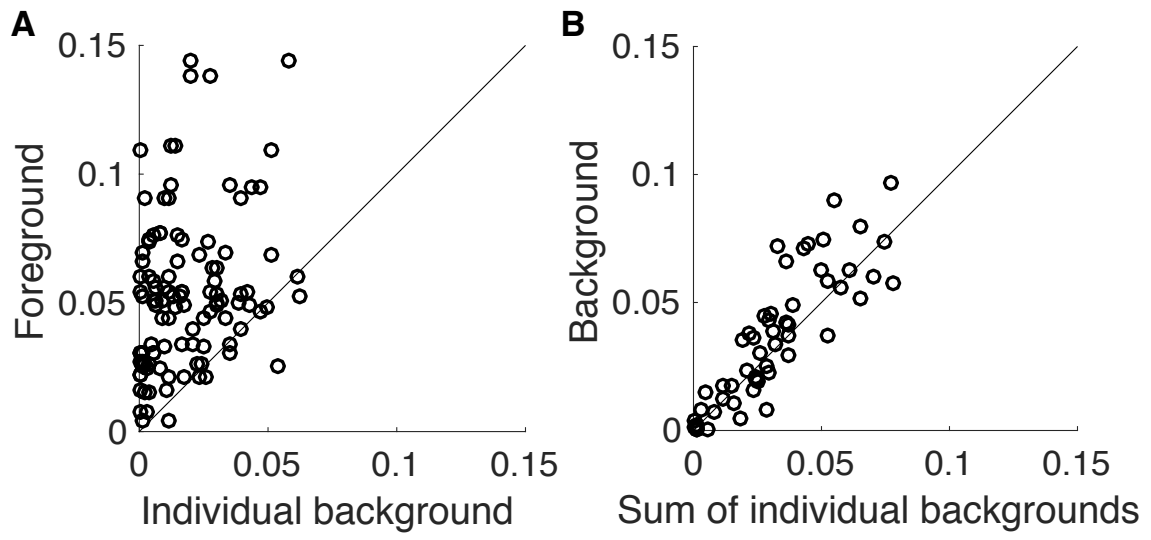

702

703

704 Figure 4

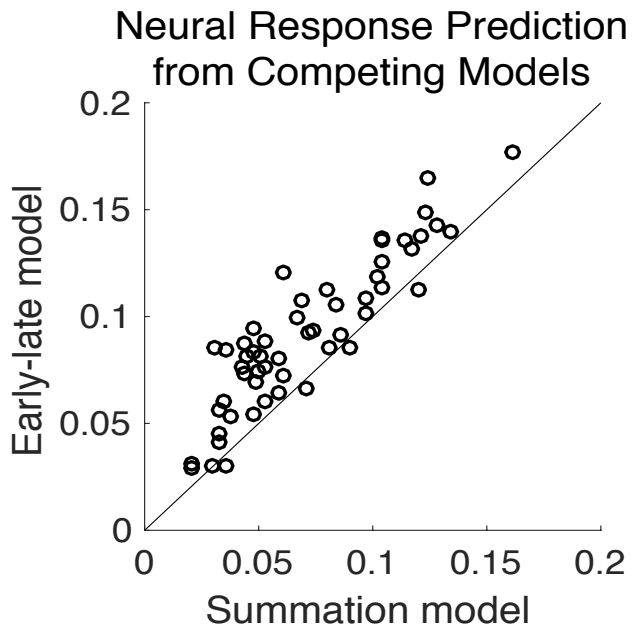

705

706

707 Figure 5
